# Supplementary material for: Novel mechanisms of eIF2B action and regulation by eIF2α phosphorylation
Source: PubMed Central journal article supplement — Nucleic Acids Res. 2017 Sep 25;45(20):11962–79. doi: 10.1093/nar/gkx845 (PMC5714165; doi:10.1093/nar/gkx845), 2017-09-25
Supplement: gkx845_supp.pdf [file gkx845_supp.pdf]

## **Novel mechanisms of eIF2B action and regulation by eIF2 $\alpha$ phosphorylation**

Andrew M. Bogorad, Kai Ying Lin & Assen Marintchev

Boston University School of Medicine, Dept. of Physiology & Biophysics, Boston, MA, 02118

### **Supplementary Material**

Supplementary Methods, one Supplementary Table, nine Supplementary Figures, and Supplementary References.

**Table S1. Docking eIF2 $\alpha$  on eIF2B**

| Docking model                            | Binding partner | Distances        |               |               |                         |               |
|------------------------------------------|-----------------|------------------|---------------|---------------|-------------------------|---------------|
|                                          |                 | NMR <sup>1</sup> |               |               | Cross-link <sup>2</sup> |               |
|                                          |                 | < 5 Å<br>(%)     | < 10 Å<br>(%) | > 10 Å<br>(%) | < 10 Å<br>(%)           | < 15 Å<br>(%) |
| NMR<br>+<br>cross-linking<br>(this work) | eIF2B $\alpha$  | 14<br>67 %       | 21<br>100 %   | 0<br>0 %      | 7<br>88 %               | 8<br>100 %    |
|                                          | eIF2B $\beta$   | 6<br>38 %        | 11<br>69 %    | 5<br>31 %     | 4<br>67 %               | 6<br>100 %    |
|                                          | eIF2B $\delta$  |                  |               |               | 3<br>100 %              | 3<br>100 %    |
| Cross-linking only<br>(1) <sup>3</sup>   | eIF2B $\alpha$  | 7<br>33 %        | 14<br>67 %    | 7<br>33 %     | 7<br>88 %               | 8<br>100 %    |
|                                          | eIF2B $\beta$   | 3<br>19 %        | 7<br>44 %     | 9<br>56 %     | 6<br>100 %              | 6<br>100 %    |
|                                          | eIF2B $\delta$  |                  |               |               | 3<br>100 %              | 3<br>100 %    |

<sup>1</sup> NMR distance restraints were set to 5 Å. Distances < 10 Å were considered allowed, to account for docking the proteins as rigid bodies, and docking human eIF2 $\alpha$  to *S. pombe* eIF2B. Distances > 10 Å were considered restraint violations.

<sup>2</sup> Cross-linking distance restraints were set to 10 Å. Distances < 15 Å were considered allowed, to account for docking the proteins as rigid bodies, and docking human eIF2 $\alpha$  to *S. pombe* eIF2B. Distances > 15 Å were considered restraint violations (no such restraint violations were observed in any of the two docking models).

<sup>3</sup> Analyzed as a reference.

Fig. S1

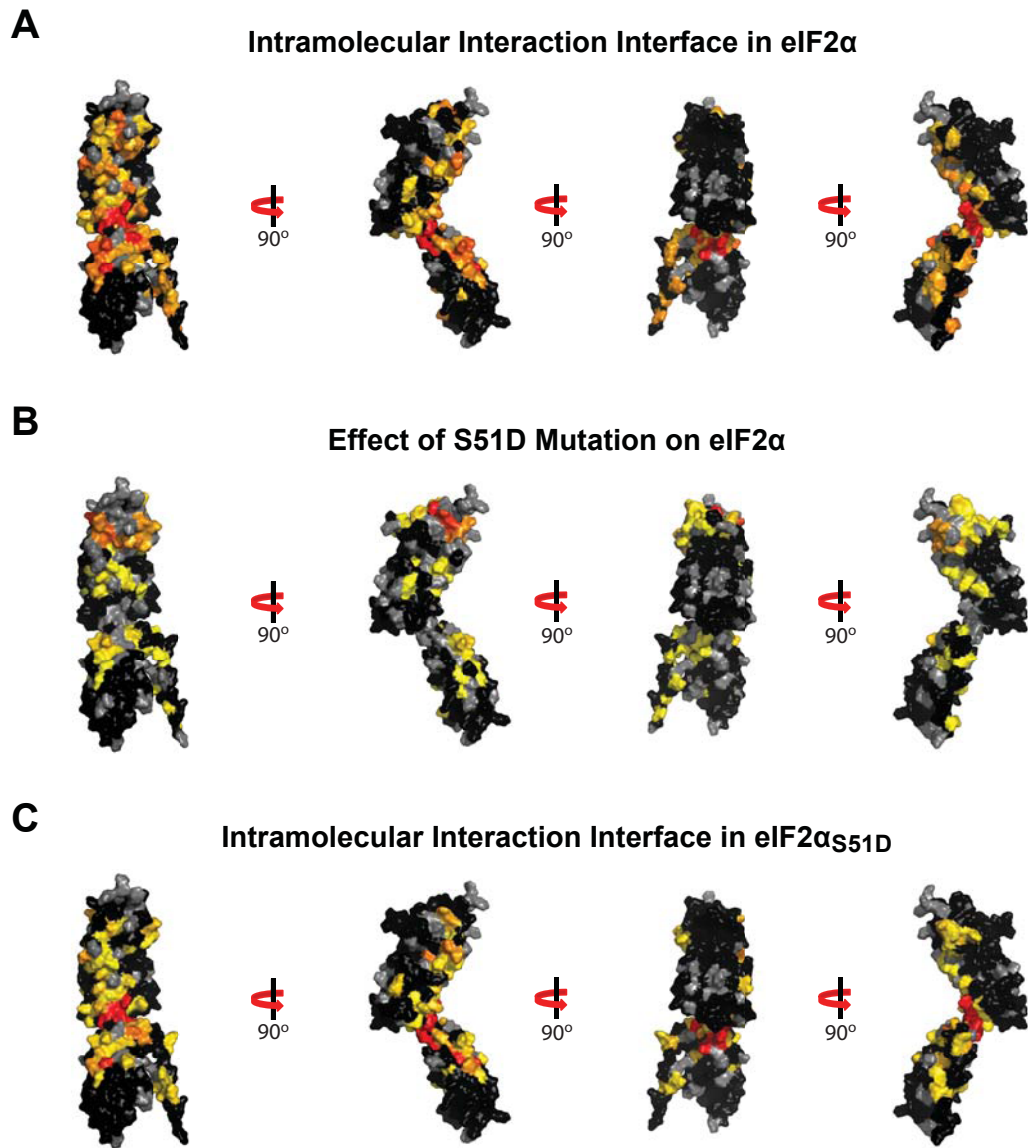

**Figure S1. Comparisons of the CSP effects of the phosphomimetic mutation S51D and deletion analysis of the eIF2 $\alpha$  intermolecular interaction**

(A) Residues affected by the intramolecular interaction mapped onto the structure of eIF2 $\alpha$ , colored from **yellow** ( $>1$  standard deviation ( $\sigma$ )) to **red** ( $>3\sigma$ ). Indeterminate residues are colored **grey**. Residues  $<1\sigma$  are colored **black**. A contiguous surface is apparent, also involving the CTT. Residues 302-314 were absent in the NMR structure and are thus not displayed here and were not obviously affected. This panel is identical to **Fig. 1D**. (B) Residues affected by the phosphomimetic mutation mapped onto the structure of eIF2 $\alpha$ . Coloring is as in panel A. Comparison to panel A reveals that the effects of the phosphomimetic mutation overlap substantially with the intramolecular surface, but are of smaller magnitude. This panel is identical to **Fig. 2D**. (C) Residues affected by the intramolecular interaction in eIF2 $\alpha_{S51D}$  mapped onto the structure of eIF2 $\alpha$ , colored as in panel A. Comparison to panel A reveals that the effects of the intramolecular interaction in eIF2 $\alpha_{S51D}$  are essentially the same as in WT eIF2 $\alpha$ , but are of smaller magnitude.

A

### The S51D Mutation Destabilizes the eIF2 $\alpha$ -NTD/CTD Interaction

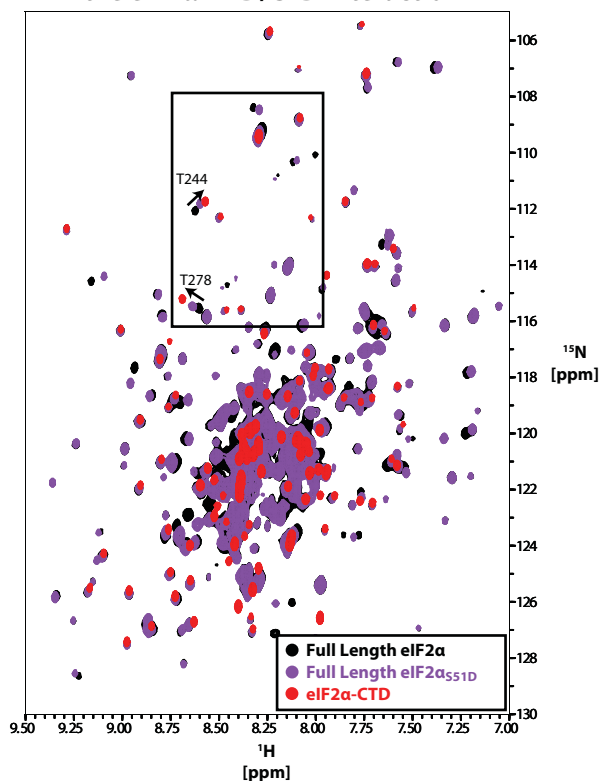

B

### Effects of the S51D Mutation on eIF2 $\alpha$ -NTD

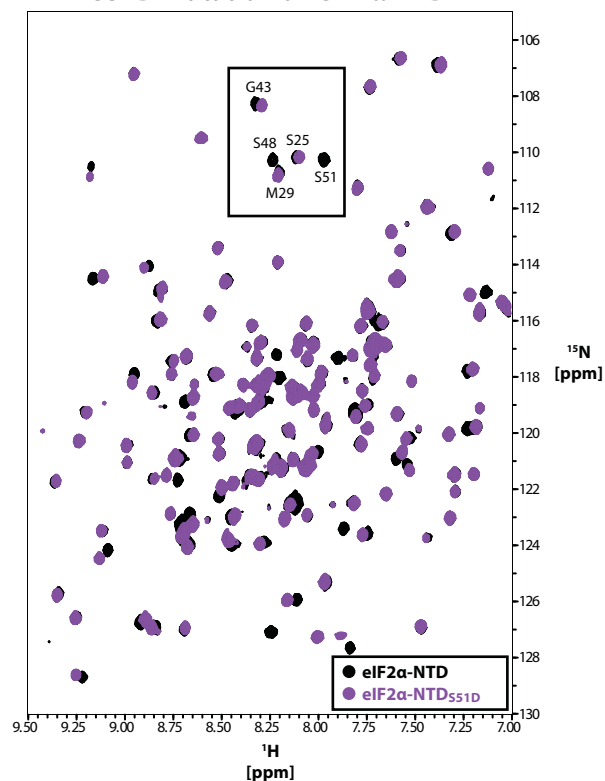

C

### The S51D Mutation Partially Mimics Effects of NTD Deletion

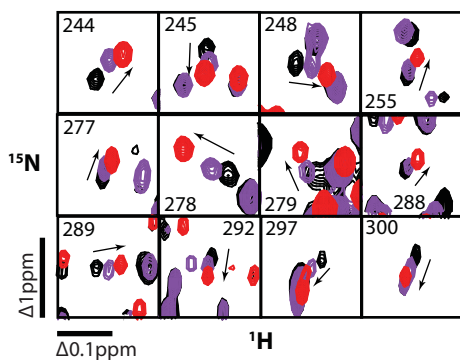

D

### Fractional Movement from "Bound" to "Free"

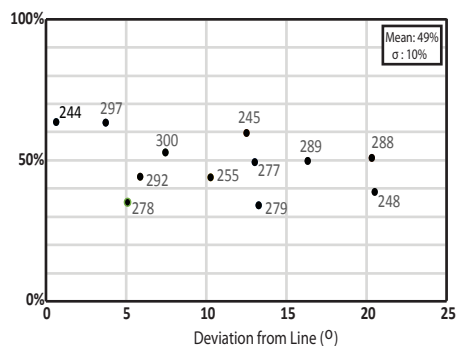

E

### Phosphorylation and the S51D Mutation have similar effects on the eIF2 $\alpha$ -NTD/CTD Interaction

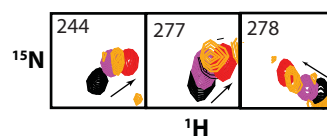

F

### Comparison of Chemical Shift Perturbations due to NTD/CTD Deletion and due to the S51D Mutation

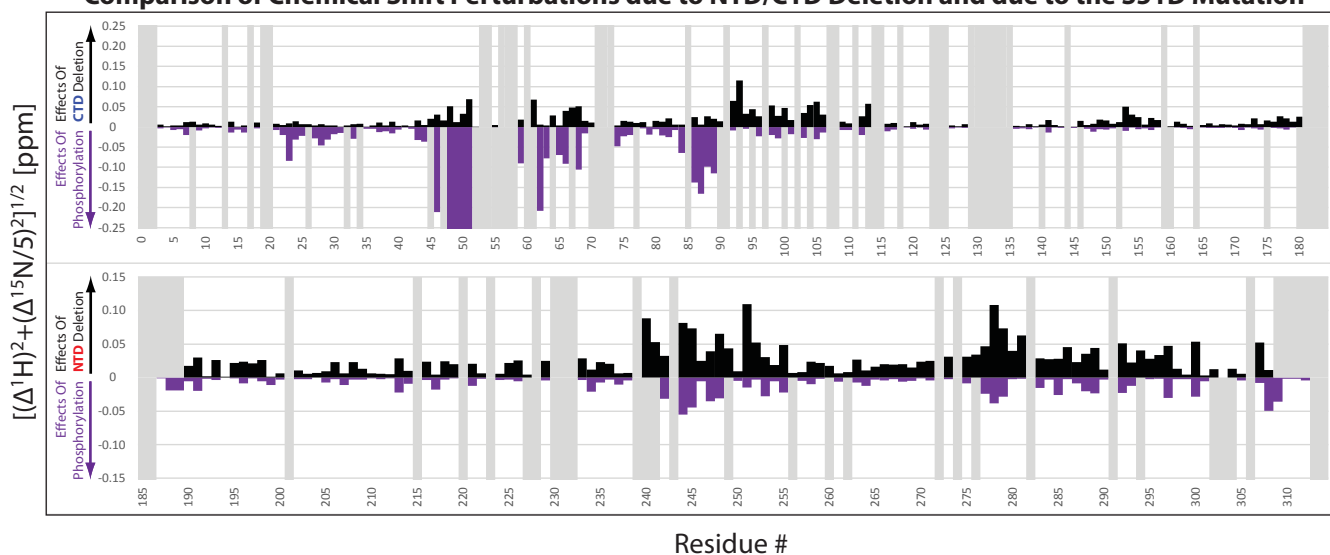

N  
T  
D  
  
C  
T  
D

## Figure S2. Effects of the phosphomimetic mutation S51D on the eIF2 $\alpha$ intermolecular interaction

(A) TROSY-HSQC spectra of  $^2\text{H}/^{15}\text{N}$ -labeled full length eIF2 $\alpha$  (**black**), full length phosphomimetic eIF2 $\alpha$  (**purple**), and  $^2\text{H}/^{15}\text{N}/^{13}\text{C}$ -labeled eIF2 $\alpha$ -CTD (**red**). Arrows indicate movement of peaks away from their full length WT positions. The boxed area corresponds to the blown up frame shown in Figure 2E. (B) TROSY-HSQC spectra of  $^2\text{H}/^{15}\text{N}$ -labeled eIF2 $\alpha$ -NTD (**black**) and phosphomimetic eIF2 $\alpha$ -NTD<sub>S51D</sub> (**purple**). (C) Shown in individual insets are peaks for eIF2 $\alpha$ -CTD residues experiencing chemical shift perturbations of  $1\sigma$  or greater, derived from the spectra comparison shown in (A). The pattern of peak movement indicates a destabilizing effect of the phosphomimetic mutation on the intramolecular interaction in eIF2 $\alpha$ , since the peaks in the phosphomimetic eIF2 $\alpha$  mutant are intermediate between the peak positions in full-length WT eIF2 $\alpha$  and those in free eIF2 $\alpha$ -CTD. (D) For the residues highlighted in (C), the fractional displacement along the line and the magnitude of deviation off of the line were calculated. A value of 100% corresponds to final location on top of the eIF2 $\alpha$ -CTD peak position, while a value of 0% indicates no movement and thus a final location on top of the wild-type eIF2 $\alpha$  peak position. Resulting mean fractional displacement of  $\sim 50\%$  indicates peak positions are halfway between eIF2 $\alpha$  (“bound” state) and eIF2 $\alpha$ -CTD (“free” state). No pattern emerged based on angular deviation. (E) Shown in individual insets are select peaks for eIF2 $\alpha$ -CTD residues from (C), with the peak from the spectrum of phosphorylated full-length eIF2 $\alpha$  overlaid in gold over the spectra of full-length eIF2 $\alpha$  (**black**), full length phosphomimetic eIF2 $\alpha$  (**purple**), and eIF2 $\alpha$ -CTD (**red**). The pattern of peak movement indicates a slightly greater destabilizing effect on the intramolecular interaction in eIF2 $\alpha$  by phosphorylation, compared to the phosphomimetic mutation, since the peaks in phosphorylated eIF2 $\alpha$  are slightly closer to the peak position in free eIF2 $\alpha$ -CTD. (F) Plot of chemical shift perturbations due to deletion of the opposite domain (**black**) as well as due to the phosphomimetic mutation (**purple**). Grey bars represent indeterminate residues for which no analysis could be performed. A substantial overlap exists between residues affected by intramolecular interaction and by the S51D mutation, as can also be visually seen by comparing **Fig. S1A** and **B**.

Fig. S3

**A** Closed eIF2 $\alpha$  conformation in the context of the eIF2 structure

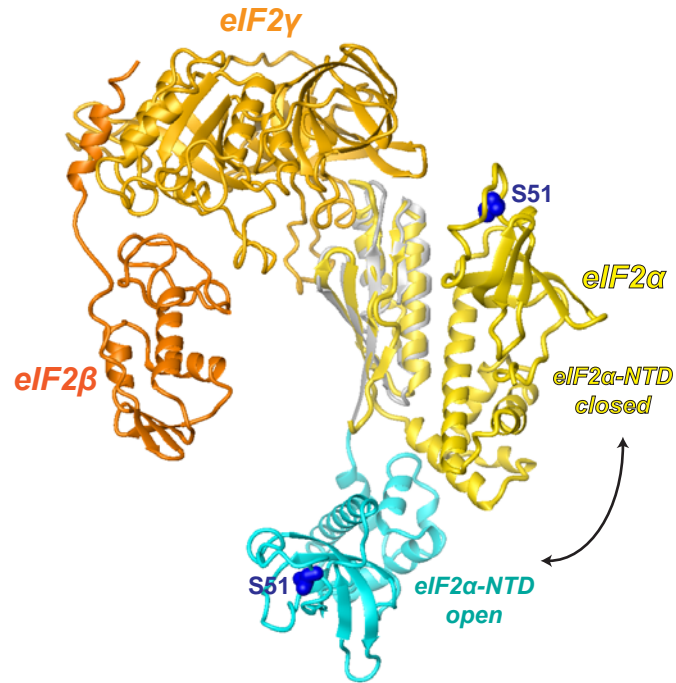

**B** Effect of the S51D mutation on eIF2 $\alpha$  mobility in GFC

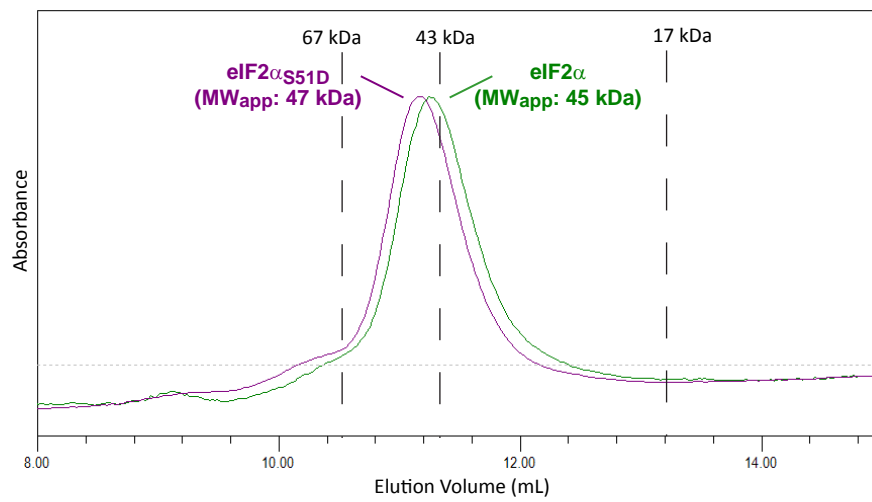

**Figure S3.**

**(A) Closed eIF2 $\alpha$  conformation in the context of the eIF2 structure.** aIF2 from the structure of the archaeal eIF2-GTP•Met-tRNA<sub>i</sub> complex (3V11.pdb) (2) is shown as ribbon. aIF2 $\beta$  is orange-red; aIF2 $\gamma$  is orange; aIF2 $\alpha$ -CTD is grey; and aIF2 $\alpha$ -NTD is grey. The CTD of human eIF2 $\alpha$  (shown in yellow) in closed conformation, as in **Fig. 1E**, was aligned to the CTD of aIF2 $\alpha$ . The side-chain of S51 is shown in blue. eIF2 $\alpha$  is in orientation similar to that in **Fig. 1E**.

**(B) Effects of the phosphomimetic S51D mutation on eIF2 $\alpha$  mobility in Gel Filtration Chromatography (GFC).** GFC traces of WT eIF2 $\alpha$  (green) and eIF2 $\alpha$ <sub>S51D</sub> (magenta). The proteins were run on a GE Superdex G 75 10/300 GL column, in a 10 mM Na phosphate buffer, pH 7.0, 150 mM NaCl, 0.01 % NaN<sub>3</sub>, 2 mM DTT, 0.1 mM AEBSF, 1 mM EDTA. Positions of select molecular weight markers are shown with dashed lines. MW<sub>app.</sub> was calculated from a standard curve using molecular weight markers.



**A**eIF2Ba Binding Surface on eIF2 $\alpha$ -NTD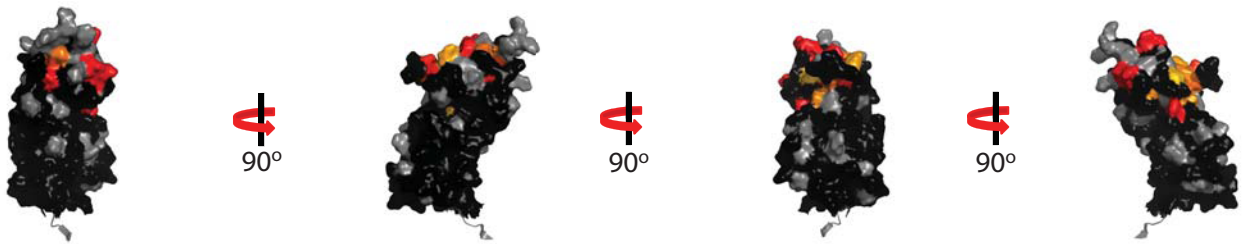**B**eIF2Ba Binding Surface on eIF2 $\alpha$ 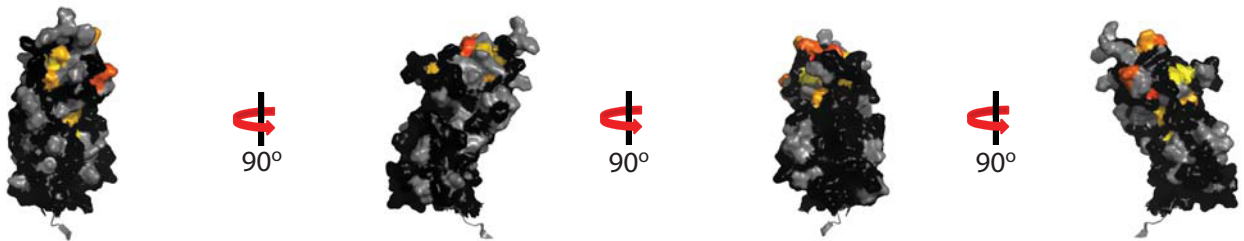**C**eIF2Ba Binding Surface on eIF2 $\alpha$ -NTD<sub>S51D</sub>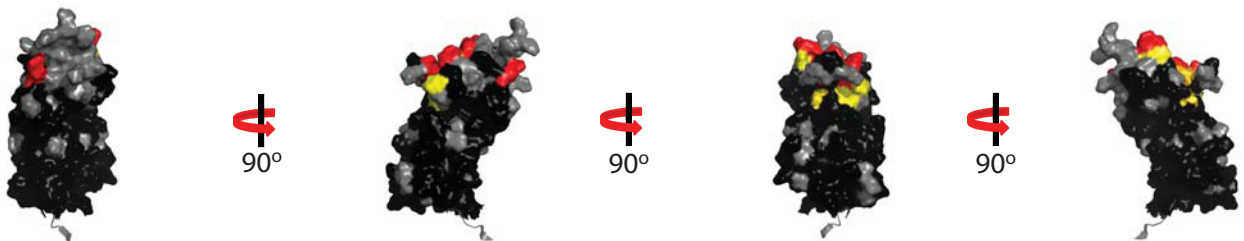**D**eIF2Ba Binding Surface on eIF2 $\alpha$ <sub>S51D</sub>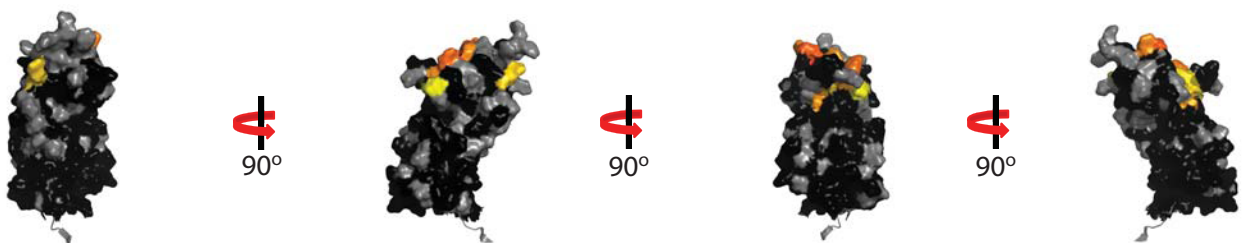

**Figure S4. Effects of the phosphomimetic S51D mutation and eIF2 $\alpha$ -CTD on eIF2B $\alpha$  binding**

Residues in eIF2 $\alpha$ -NTD (**A**), eIF2 $\alpha$  (**B**), eIF2 $\alpha$ -NTD<sub>S51D</sub> (**C**), and eIF2 $\alpha$ <sub>S51D</sub> (**D**) experiencing selective signal loss in TROSY-HSQC spectra of <sup>2</sup>H/<sup>15</sup>N-labeled protein samples upon binding to eIF2B $\alpha$ , mapped onto the structure of eIF2 $\alpha$ -NTD, colored from **yellow** (>1 $\sigma$ ) to **red** (>3 $\sigma$ ). Indeterminate residues are colored **grey**. Residues <1 $\sigma$  are colored **black**. eIF2 $\alpha$ -NTD is shown in the same orientation as in **Fig. 3D**. For full length eIF2 $\alpha$  and eIF2 $\alpha$ <sub>S51D</sub>, only the NTD is shown, as no residues in the CTD crossed the 1 $\sigma$  threshold. Surfaces appear similar for all four constructs, indicating no obvious change in binding to eIF2B $\alpha$  due to the presence of eIF2 $\alpha$ -CTD or due to the phosphomimetic mutation.

**A**

**eIF2 $\alpha$ -NTD:eIF2B $\beta$  Interaction**

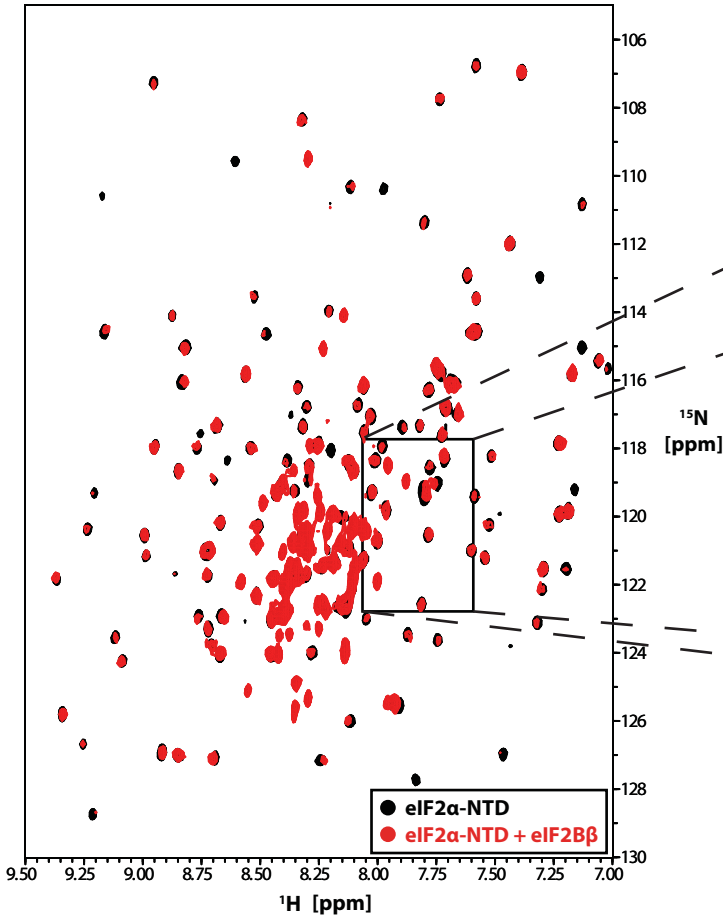

**B**

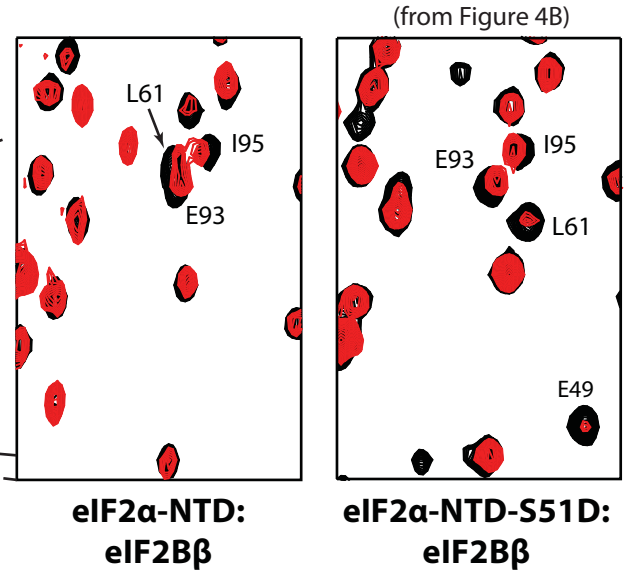

**C**

**eIF2 $\alpha$  +/- eIF2B $\beta$**

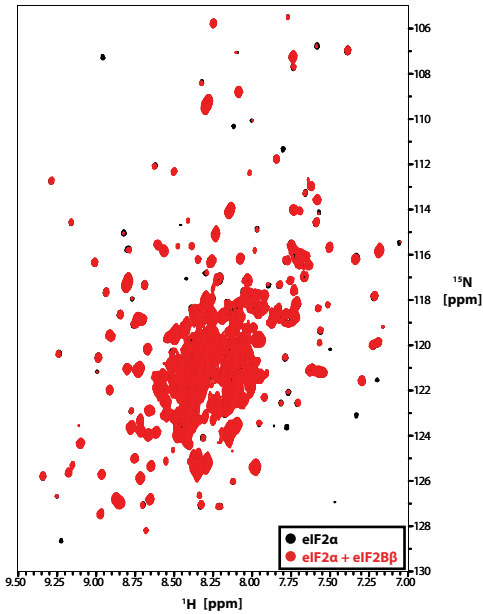

**D**

**eIF2 $\alpha$ -S51D +/- eIF2B $\beta$**

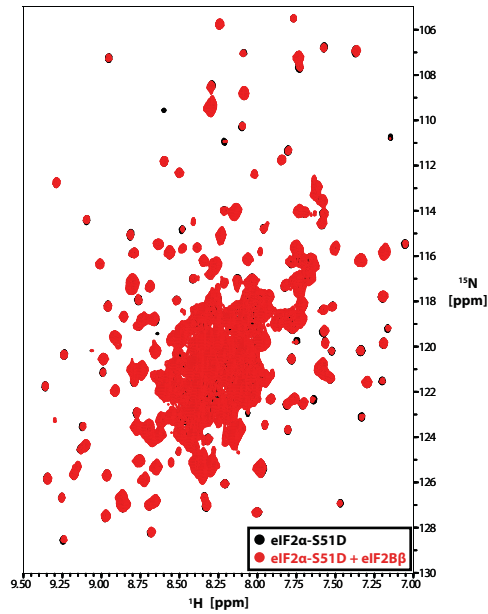

**E**

**Formation of eIF2B<sub>reg</sub>**

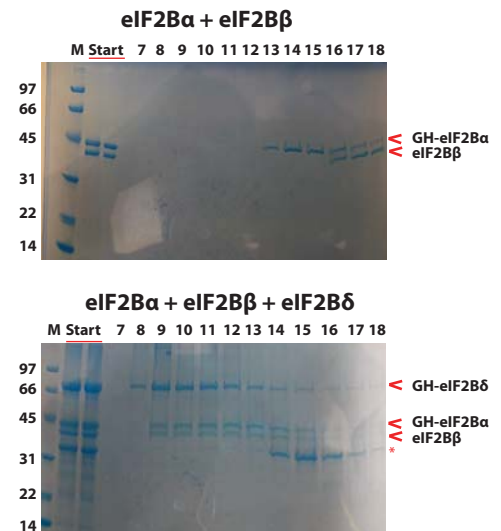

**Figure S5. Effects of the phosphomimetic mutation S51D and eIF2 $\alpha$ -CTD on eIF2B $\beta$  binding**

(A) TROSY-HSQC spectra of  $^2\text{H}/^{15}\text{N}$ -labeled eIF2 $\alpha$ -NTD in the absence (**black**) and presence (**red**) of excess eIF2B $\beta$ . (B) Boxed area in (A) with boxed area from **Fig. 4B** for comparison. Intermolecular surface was similar to that of eIF2 $\alpha$ -NTD<sub>S51D</sub> shown in **Fig. 4D**. TROSY-HSQC spectra of  $^2\text{H}/^{15}\text{N}$ -labeled eIF2 $\alpha$  (C) and eIF2 $\alpha$ <sub>S51D</sub> (D) in the absence (**black**) and presence (**red**) of excess eIF2B $\beta$ . No significant binding was observed. (E) SDS PAGE of fractions from Gel Filtration Chromatography (GFC) of a mix of GH-eIF2B $\alpha$  and eIF2B $\beta$  (top), and GH-eIF2B $\alpha$ , eIF2B $\beta$ , and GH-eIF2B $\delta$  (bottom). Free eIF2B $\alpha$  is a dimer, whereas eIF2B $\beta$  and eIF2B $\delta$  are monomers. *M*, molecular weight markers, *Start*, starting material, 7-18, GFC fraction numbers. The protein positions are labeled on the right. A truncated eIF2B $\delta$  fragment is labeled with an asterisk (\*).

A

## Proposed eIF2 binding surface on eIF2B

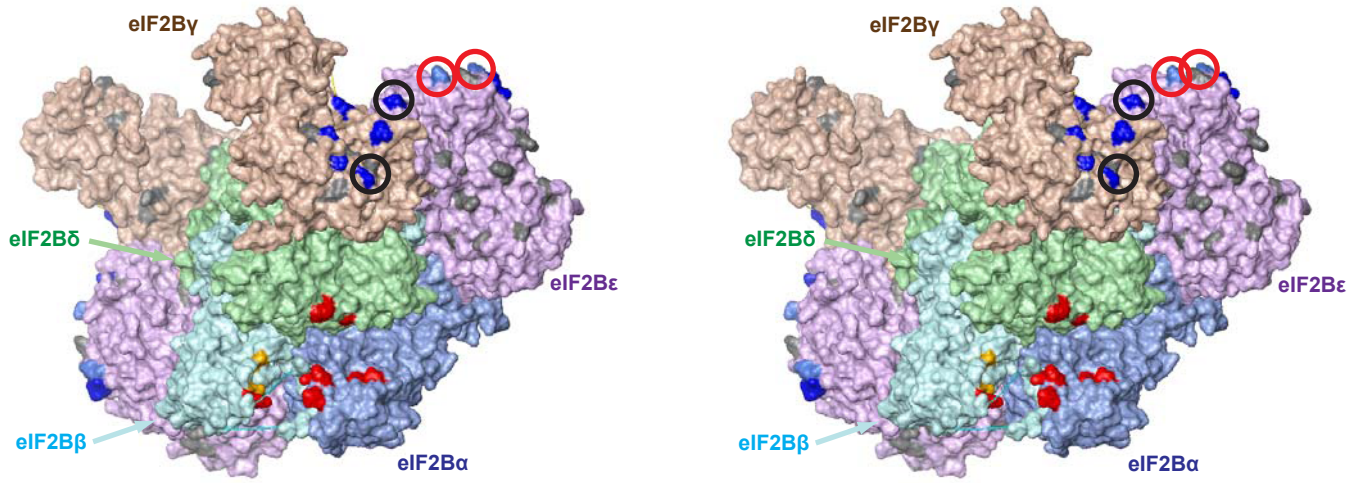

B

## Docking the eIF2 ternary complex (TC) on the eIF2B structure

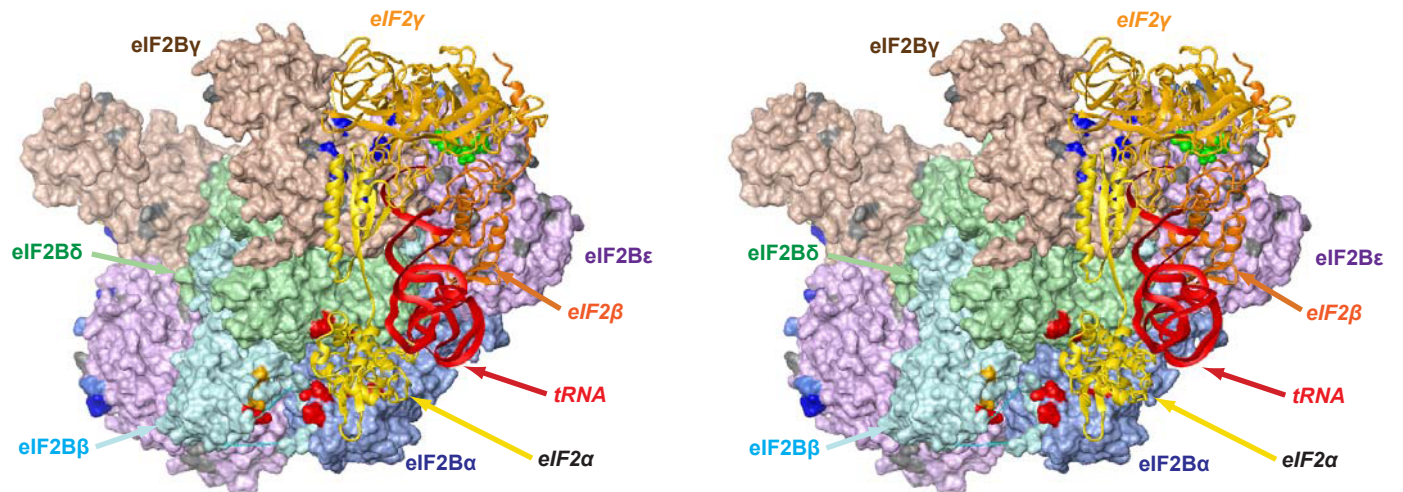

### Figure S6. Docking the eIF2-TC on eIF2B

**(A)** Cross-eyed stereo view of the surface on eIF2B proposed to bind the eIF2 heterotrimer. eIF2B $\alpha/\beta/\delta$  residues shown to cross-link to both phosphorylated and unphosphorylated eIF2 $\alpha$  are **red**; residues in eIF2B $\beta$  that cross-link only to unphosphorylated eIF2 $\alpha$  are **orange** (1). eIF2B $\gamma/\epsilon$  residues shown to cross-link to eIF2 $\gamma$  in eIF2B•apo-eIF2 complexes are **navy**, except the two eIF2B $\epsilon$  residues with lower efficiency of cross-linking to eIF2( $\alpha$ -P)-GDP than to apo-eIF2 (1), which are **light blue**. The sites of CACH/VWM mutations in eIF2B $\gamma/\epsilon$  are **grey**. The same coloring scheme for eIF2B is used in panel (B) and in Figures S5B, S6, and S7. The two eIF2B $\gamma/\epsilon$  residues shown to cross-link equally well to both apo-eIF2 and eIF2( $\alpha$ -P)-GDP (1) are marked with black circles. The two eIF2B $\epsilon$  residues with lower efficiency of cross-linking to eIF2( $\alpha$ -P)-GDP than to apo-eIF2 (1) are **light blue** and marked with red circles.

**(B)** Cross-eyed stereo view of the eIF2-GTP•Met-tRNA<sub>i</sub> ternary complex (TC) from the *S. cerevisiae* 48S pre-initiation complex (3JAQ.pdb) (3) docked on eIF2B. eIF2B coloring is as in panel (A). eIF2-TC is shown as ribbon.

**A** Model of the eIF2B:TC complex with eIF2B colored by electrostatic potential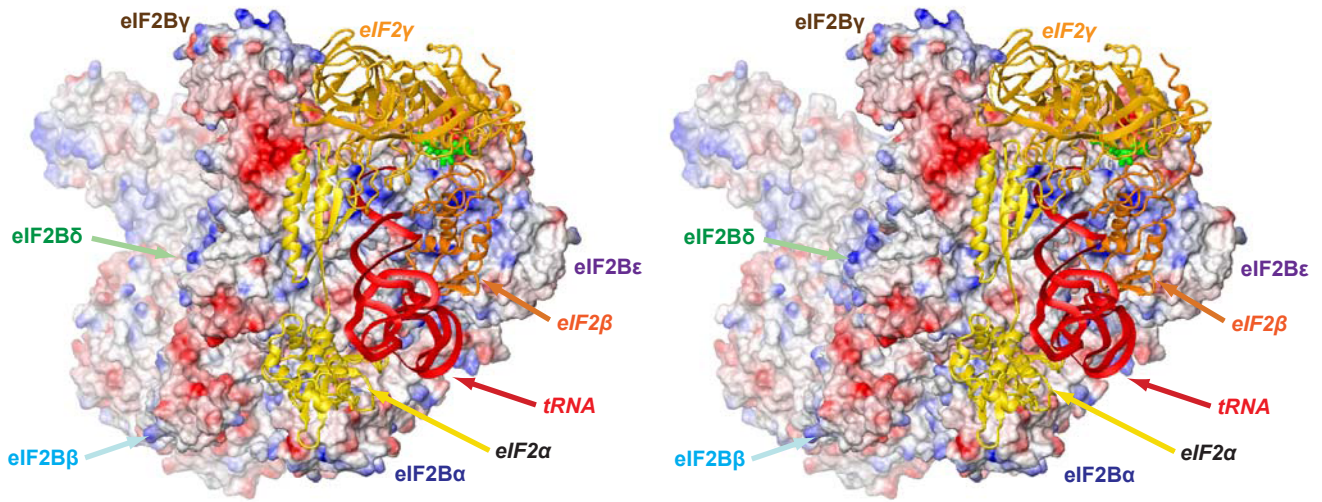**B** Model of the eIF2B:TC complex with positions of cross-links (GTP and Met-tRNA<sub>i</sub> are not shown)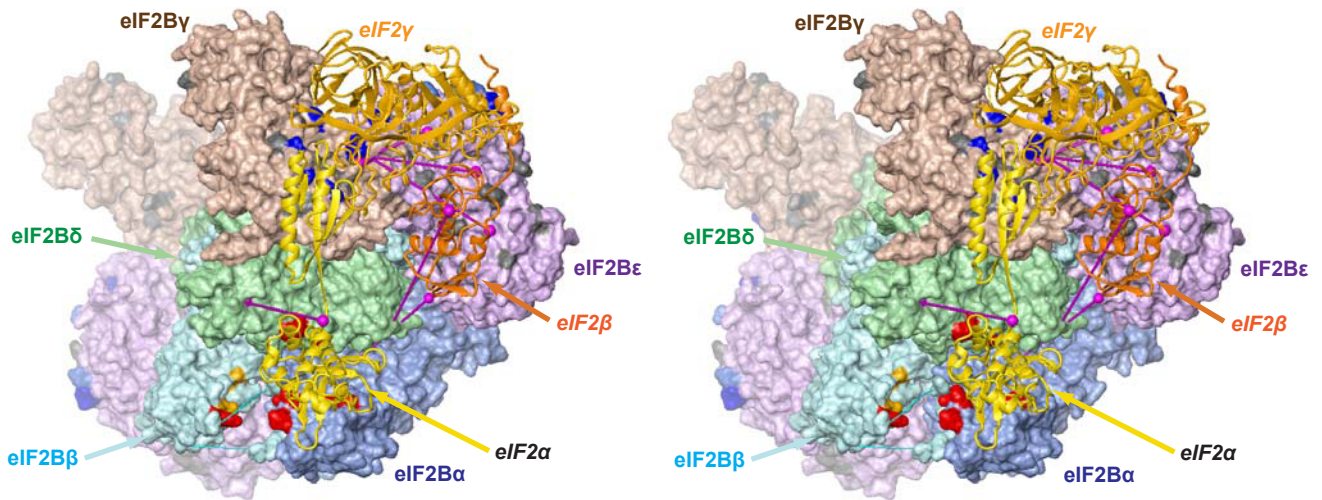

**Figure S7. Validating the eIF2B•TC model**

(A) Cross-eyed stereo view of the eIF2B•TC complex, with eIF2B colored based on electrostatic potential (blue indicates positive charges; red indicates negative charges). The color scheme of TC is as in **Fig. S6B**. (B) Cross-eyed stereo view of the eIF2B•TC complex, with eIF2B and eIF2 residues reported to cross-link to each other (4) shown in **magenta** and connected with **magenta** lines). The tRNA and nucleotide are not shown so as not to visually obscure cross-links. eIF2B and eIF2 coloring is as in **Fig. S6B**.



**A****Docking eIF2B $\epsilon$ -CTD  
on the eIF2B:TC complex**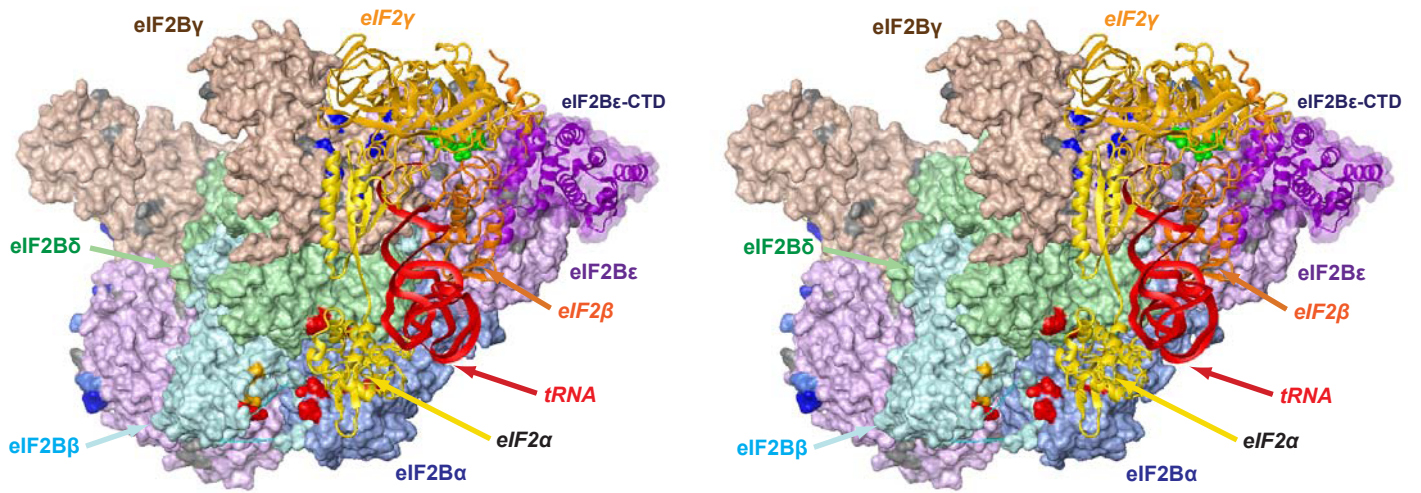**B****Merging the  
eIF2B:eIF2 model and eIF2B:TC model**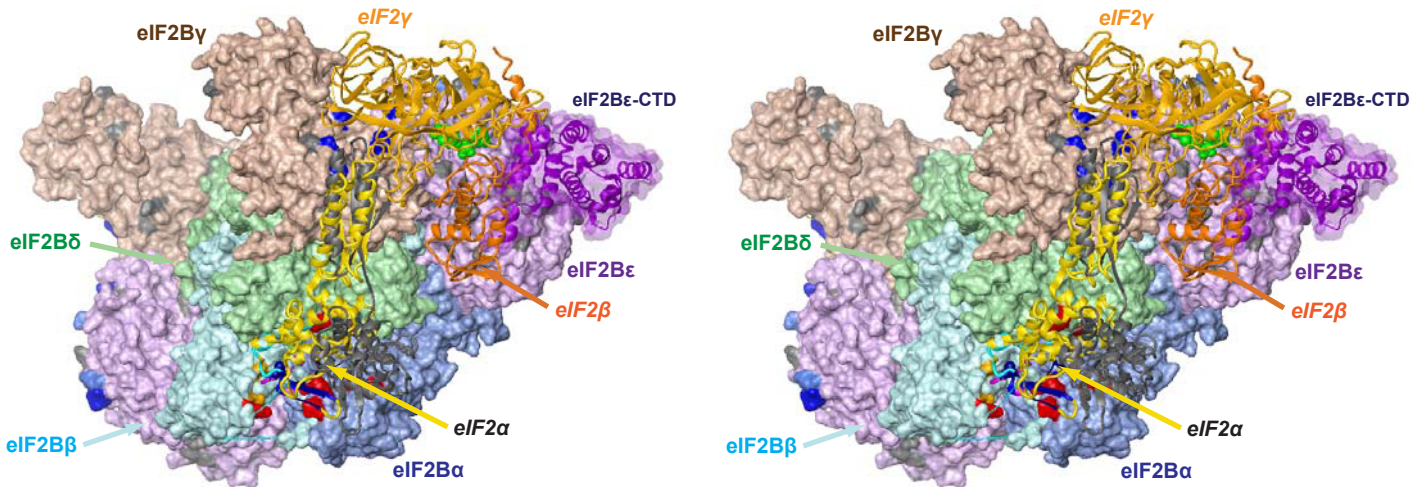

**Figure S8. Building a model of the eIF2B•eIF2( $\alpha$ -P)-GDP complex**

(A) Cross-eyed stereo view of the eIF2B•TC with the structure of human eIF2B $\epsilon$ -CTD (3JUL.pdb) (5) docked such that it interacts with a CACH/VWM mutation-rich surface on eIF2B $\epsilon$  as well as oriented such that residues important for catalytic activity are facing the G-domain of eIF2 $\gamma$ . eIF2B and eIF2 coloring is as in **Fig. S6B**. (B) Cross-eyed stereo view of the eIF2B•eIF2 $\alpha$  model shown in **Fig. 6A** merged with the model of the eIF2B•TC complex shown in **Fig. 6B**. eIF2 $\alpha$  from the eIF2B•eIF2 $\alpha$  model is colored **yellow**, with individual residues in eIF2 $\alpha$  colored according to the following scheme: (i) residues in the P-loop are **purple**, unless colored as detailed below; (ii) residues affected by eIF2B $\alpha$  binding (see **Fig. 3**) are **navy**; (iii) residues affected by eIF2B $\beta$  binding (see **Fig. 4**) are **cyan**; and (iv) residues affected by both are **blue**. eIF2 $\alpha$  from the eIF2B•TC model is colored **grey**. The tRNA is not shown.

**A**

**Potential ligand-binding sites in eIF2B**

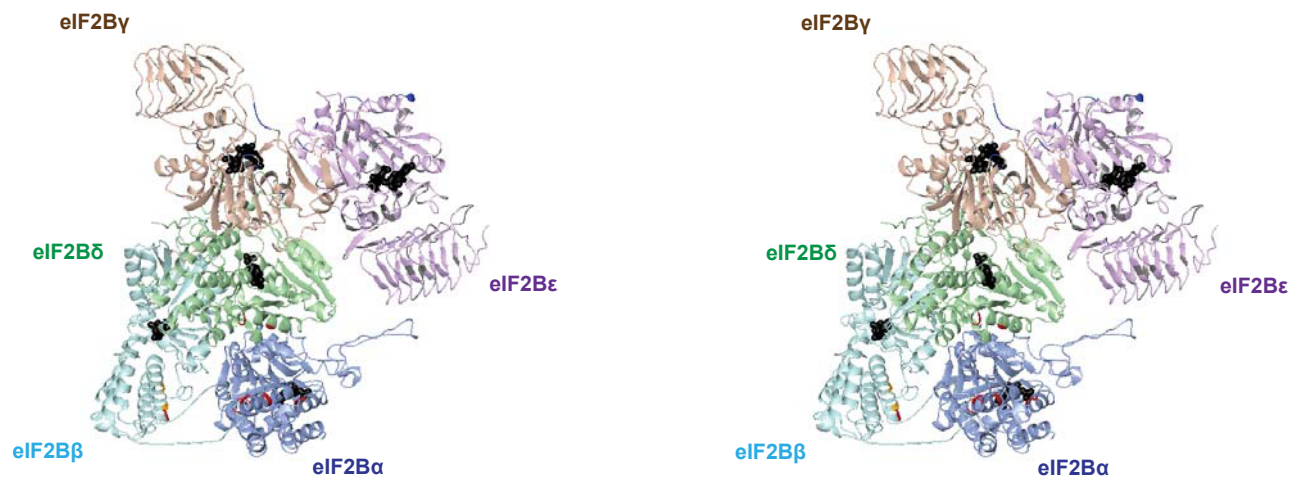

**B**

**Positions of ligand-binding sites indicate possible effects on eIF2 binding/nucleotide exchange**

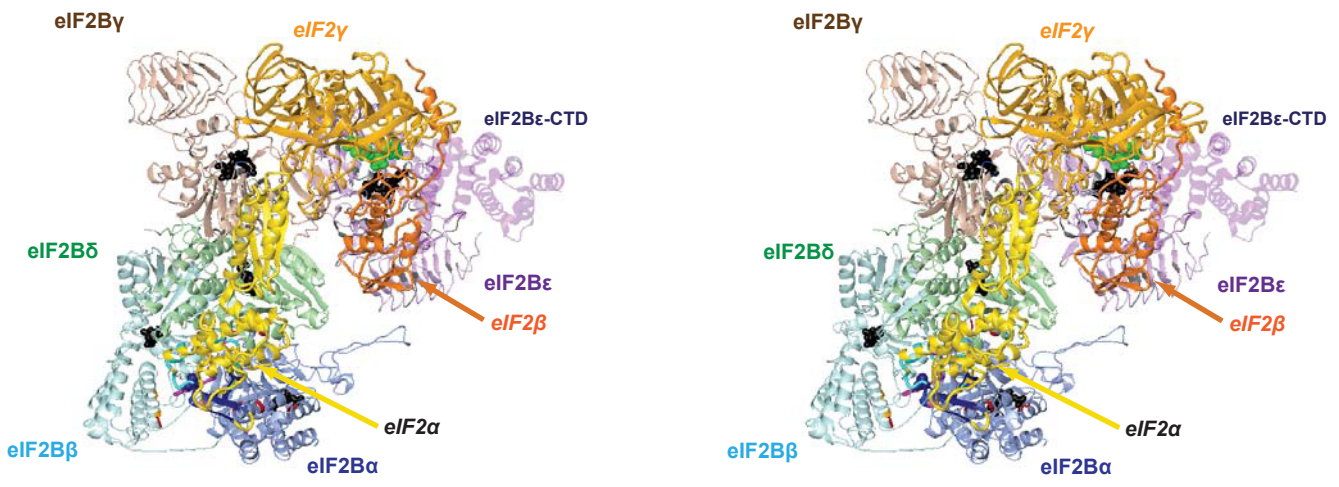

**C**

**Model of the eIF2B:eIF2 complex (shown for reference)**

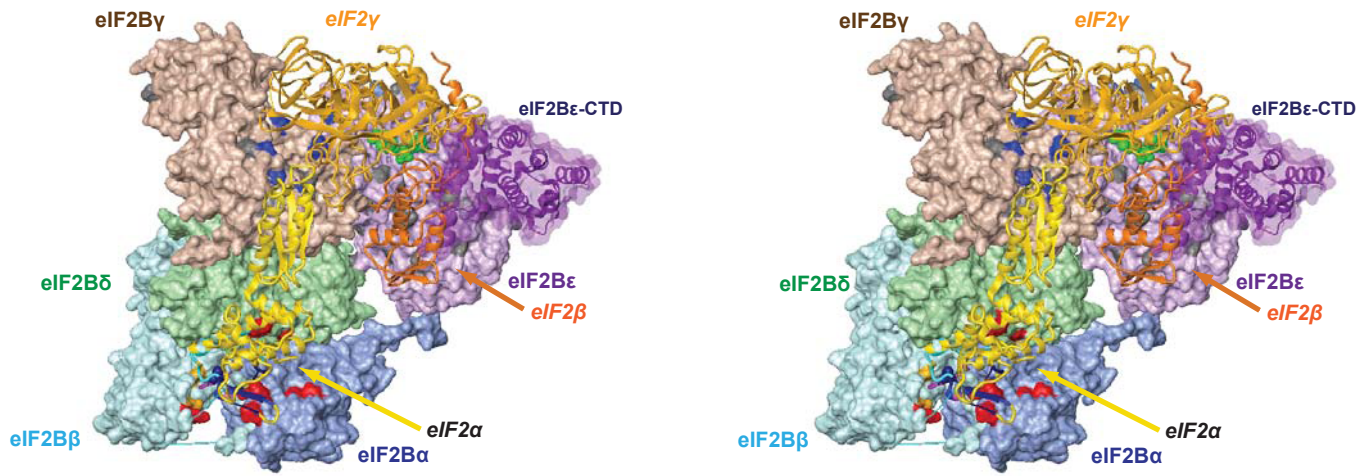

**Figure S9. Potential mechanisms of eIF2B regulation by small molecules**

(A) Cross-eyed stereo view of eIF2B in ribbon representation with potential ligand-binding locations shown as **black** spheres. Only one copy of each subunit is displayed for simplicity. eIF2B coloring is as in **Fig. S6**. (B) The same view as in (A), but with eIF2( $\alpha$ -P)-GDP overlaid. eIF2B coloring is as in panel (A). eIF2 coloring is as in **Fig. S8B**. (C) The same view as in (B), but with eIF2B in surface representation.

## Supplementary References

1. Kashiwagi, K., Takahashi, M., Nishimoto, M., Hiyama, T.B., Higo, T., Umehara, T., Sakamoto, K., Ito, T. and Yokoyama, S. (2016) Crystal structure of eukaryotic translation initiation factor 2B. *Nature*, **531**, 122-125.
2. Schmitt, E., Panvert, M., Lazennec-Schurdevin, C., Coureux, P.D., Perez, J., Thompson, A. and Mechulam, Y. (2012) Structure of the ternary initiation complex aIF2-GDPNP-methionylated initiator tRNA. *Nat Struct Mol Biol*, **19**, 450-454.
3. Llacer, J.L., Hussain, T., Marler, L., Aitken, C.E., Thakur, A., Lorsch, J.R., Hinnebusch, A.G. and Ramakrishnan, V. (2015) Conformational Differences between Open and Closed States of the Eukaryotic Translation Initiation Complex. *Mol Cell*, **59**, 399-412.
4. Gordiyenko, Y., Schmidt, C., Jennings, M.D., Matak-Vinkovic, D., Pavitt, G.D. and Robinson, C.V. (2014) eIF2B is a decameric guanine nucleotide exchange factor with a gamma2epsilon2 tetrameric core. *Nat Commun*, **5**, 3902.
5. Wei, J., Jia, M., Zhang, C., Wang, M., Gao, F., Xu, H. and Gong, W. (2010) Crystal structure of the C-terminal domain of the varepsilon subunit of human translation initiation factor eIF2B. *Protein Cell*, **1**, 595-603.
